# Supplementary material for: Control of the iodination reaction on activated aromatic residues in peptides
Source: Royal Society of Chemistry journal article supplement (doi:10.1039/b003064n), 2000-01-01
Supplement: b003064n.doc [file b003064n.doc]

A solution of **3** (52 mg, 0.22 mmol) in CH2Cl2 (15 ml) was reacted with HBF4 (30 l, 0.22 mmol of a commercially available 54% solution in ether) and then IPy2BF4 was added (82 mg, 0.22 mmol). After stirring the mixture for 15 minutes at rt, standard aqueous workup, isolation and chromatographic purification steps furnished **4** as colorless oil (75 mg, 93% isolated yield). *Selected data for* **4**: H(300 MHz, CDCl3) 7.46 (d, *J* 2.0 Hz, 1H), 6.95 (dd, *J* 8.0, 2.0 Hz, 1H), 6.81 (d, *J* 8.0 Hz, 1H), 6.34 (d, *J* 7.9 Hz, 1H), 4.82 (m, 1H), 3.75 (s, 3H), 2.97 (m, 2H), 2.01 (s, 3H); C(75MHz, CDCl3) 172.0, 170.4, 154.7, 139.2, 130.4, 129.0, 115.0, 84.7 (*C*-I), 53.2, 52.4, 36.4, 22.9; high-resolution MS m/z calcd for C12H14INO4 362.9967, found 362.9962.

Typical experimental procedure: The Tyr-derivative is dissolved in a 2.4mM solution of CH3CN or CH2Cl2 with 1 equiv. HBF4 or 10% of the solvent volume of TFA. Solid IPy2BF4 is added. The vial, protected from the light, is stirred 5-10 minutes, then an aliquot is removed to check the reaction conversion by analytical RP-HPLC. The main peak is isolated by semipreparative RP-HPLC and further analyzed by MALDI-TOF-MS and 1H-NMR.

Fmoc-Tyr-(3’-I)-OH was also obtained by protection of *N*-terminus of the commercially available 3-iodotyrosine with an Fmoc group. *Mass spectrometry data for* **6**: MALDI-TOF-MS m/z values for isolated peak from the crude by RP-HPLC calc. for [M+Na]+ 553.3, found [M+Na]+ 552.36, calc. For [M+K]+ 569.3, found [M+K]+ 568.36.

Three peptides, **8**, **9** and **10,** were synthesized from the iodinated commercially available building blocks: Fmoc-Tyr(3’-I)-OH, Fmoc-Phe(4’-I)-OH and Fmoc-Tyr(3’,5’-di-I)-OH, respectively. The diiodinated enkephalin **10** was also prepared by direct diiodination as reported7b using our reagent. *Mass spectrometry data for compounds* **7** *to* **10**: MALDI-TOF-MS m/z values for isolated peaks from the crude by RP-HPLC, **7** calc. for [M+Na]+ 578.8, found [M+Na]+ 578.55, calc. for [M+H]+ 556.8, found [M+H]+ 556.54; **8** calc. for [M+Na]+ 704,7, found [M+Na]+ 704.09 . **9** calc. for [M+Na]+ 704.7, found [M+Na]+ 704.21; **10** calc. for [M+Na]+ 830.6, found [M+Na]+ 830.9, calc. for [M+H]+ 808.6, found [M+H]+ 809.0*. Selected spectroscopic data from the aromatic region*: : **7** H(300 MHz, D2O) 7.17-7.04 (m, 5H), 6.95 (d, *J* 8.4 Hz, 2H), 6.66 (d, *J* 8.4 Hz, 2H);

**8** H(300 MHz, D2O) 7.46 (d, *J* 2.1 Hz, 1H), 7.17-7.04 (m, 5H), 6.94 (dd, *J* 8.4, 2.1 Hz, 1H), 6.71 (d, *J* 8.4 Hz, 1H); **9** H(300 MHz, D2O) 7.47(d, *J* 8.4 Hz, 2H), 6.93 (d, *J* 8.7 Hz, 2H), 6.79 (d, *J* 8.4, 2H); 6.64 (d, *J* 8.7 Hz, 2H); **10** H(300 MHz, D2O) 7.48(s, 2H), 7.03-7.18 (m, 5H).

*Mass spectrometry data for the iodination of compounds* **11** *and* **12** and their **iodinated derivatives**, showing the yield for the iodination in brackets: MALDI-TOF-MS m/z values for isolated peaks from the crude by RP-HPLC, **11a** calc. for [M+Na]+ 1256.1, found [M+Na]+ 1255.44; **iodinated 11a** (60%)calc. for [M+Na]+ 1382.0, found [M+Na]+ 1381.50; **11b** calc. for [M+Na]+ 1333.0, found [M+Na]+ 1332.88; **iodinated 11b** (60%)calc. for [M+Na]+ 1458.9, found [M+Na]+ 1458.82; **12** calc. for [M+Na]+ 1081.2, found [M+Na]+ 1081.6; **iodinated 12** (60%) calc. for [M+Na]+ 1207.9, found [M+Na]+ 1208.17.

** *Mass spectrometry data for compound* **13 and its iodinated derivative**, (50% yield for the iodination process): MALDI-TOF-MS m/z values for isolated peaks from the crude by RP-HPLC, **13** calc. for [M+Na]+ 1030.2, found [M+Na]+ 1030.5, **iodinated 13** calc. for [M+Na]+ 1156.1, found [M+Na]+ 1155.98.
